# Supplementary material
Source: PubMed Central journal article supplement (PMC2048805)

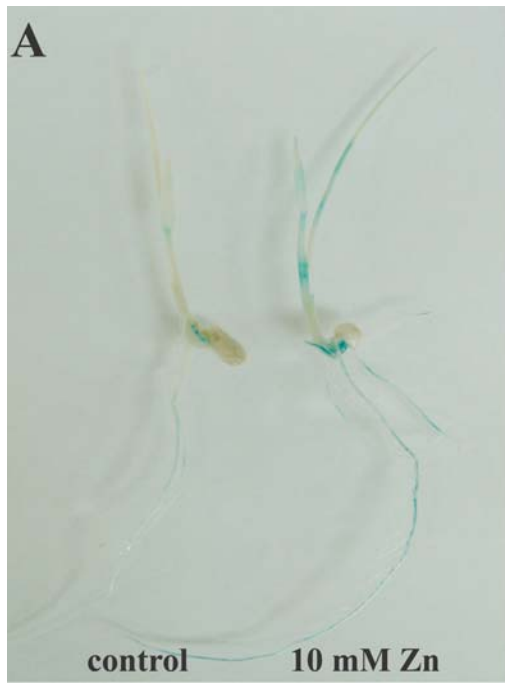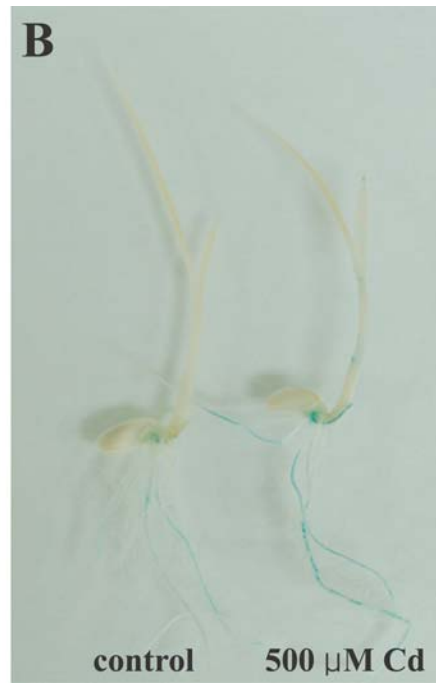

Supplement: plntphys_pp.107.102236_1.pdf [file plntphys_pp.107.102236_1.pdf]

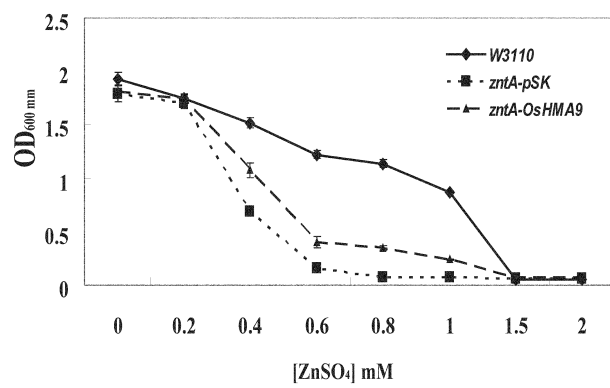

Supplement: plntphys_pp.107.102236_3.pdf [file plntphys_pp.107.102236_3.pdf]

**A**

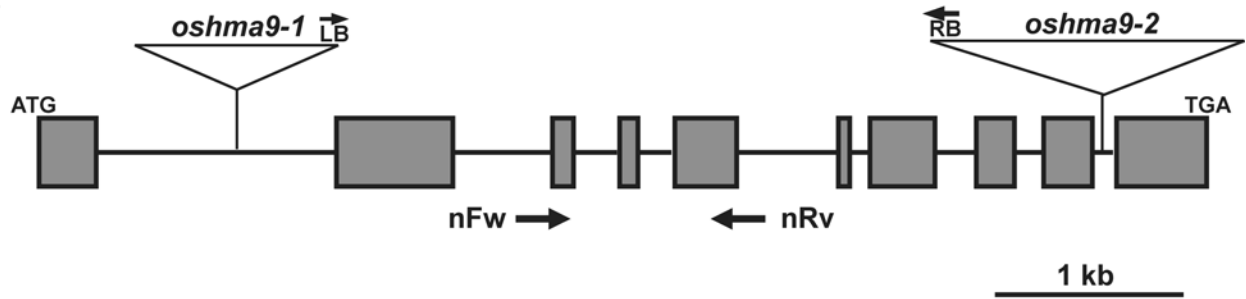

**B**

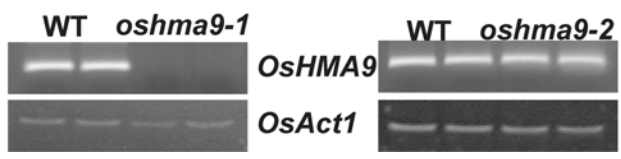

Supplement: plntphys_pp.107.102236_4.pdf [file plntphys_pp.107.102236_4.pdf]

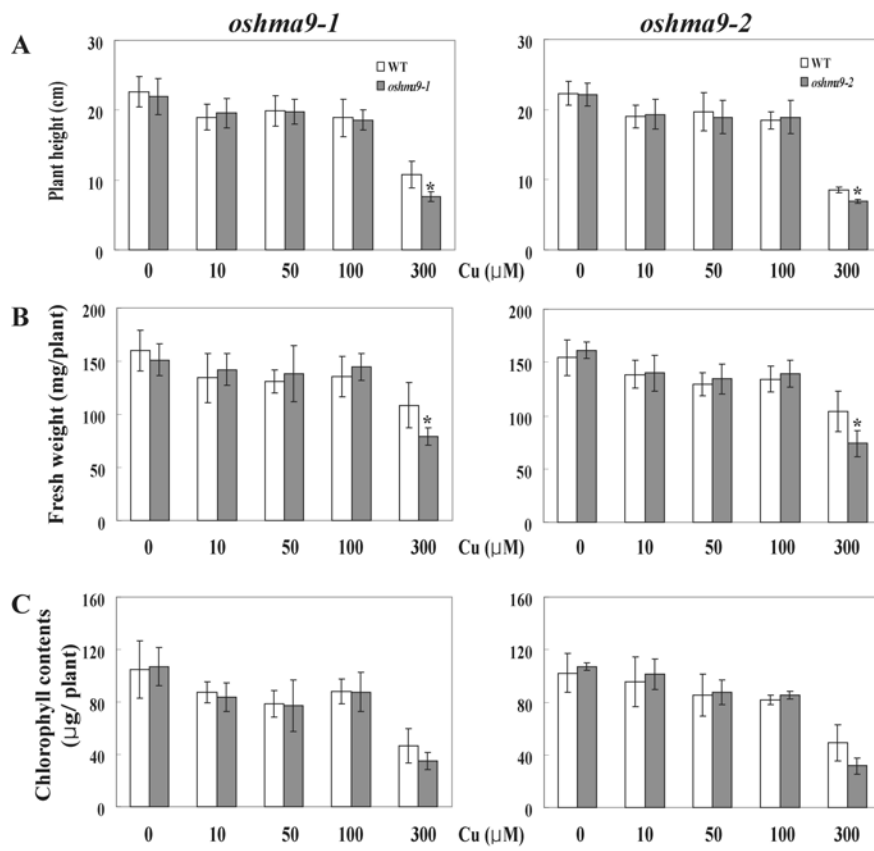

Supplement: plntphys_pp.107.102236_5.pdf [file plntphys_pp.107.102236_5.pdf]

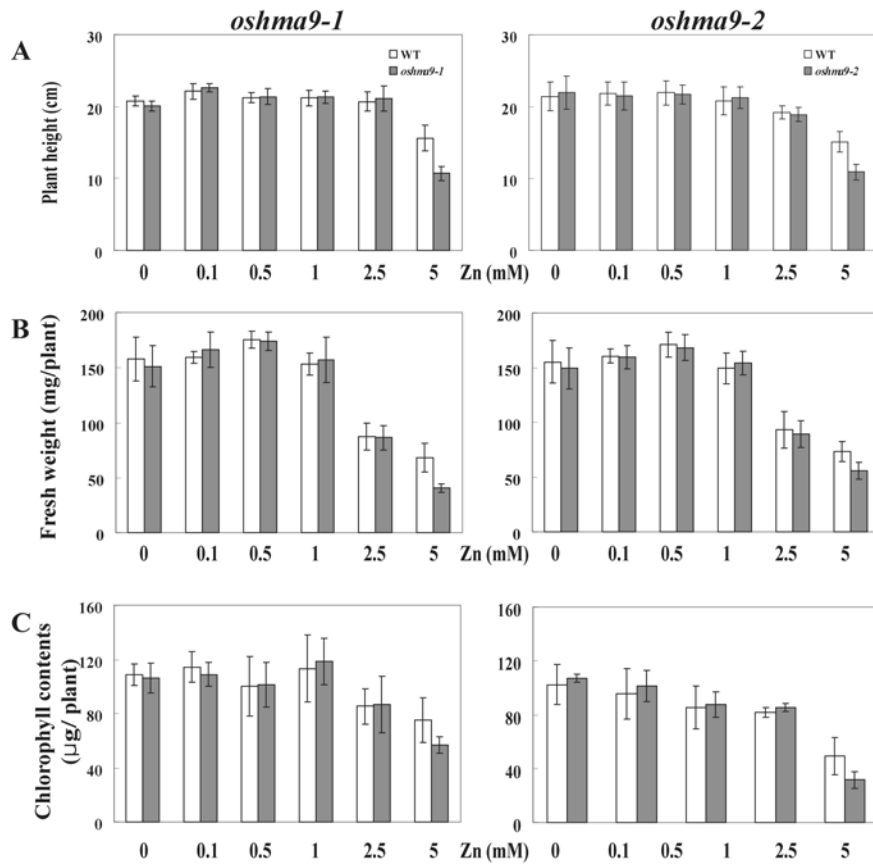

Supplement: plntphys_pp.107.102236_6.pdf [file plntphys_pp.107.102236_6.pdf]

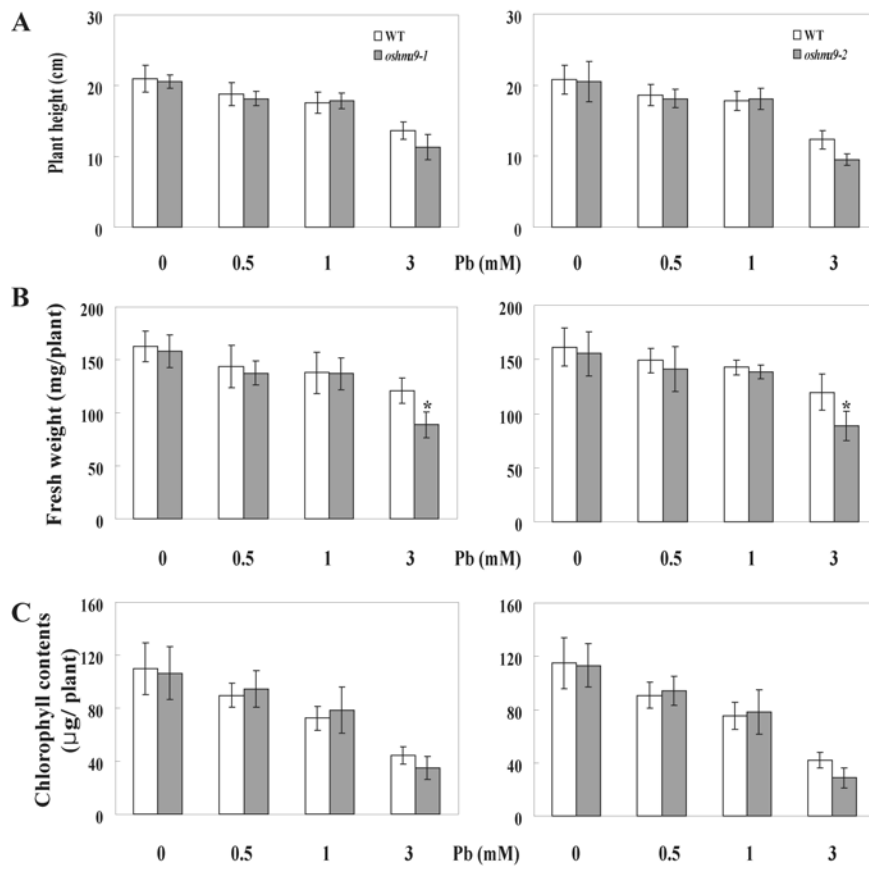

Supplement: plntphys_pp.107.102236_7.pdf [file plntphys_pp.107.102236_7.pdf]

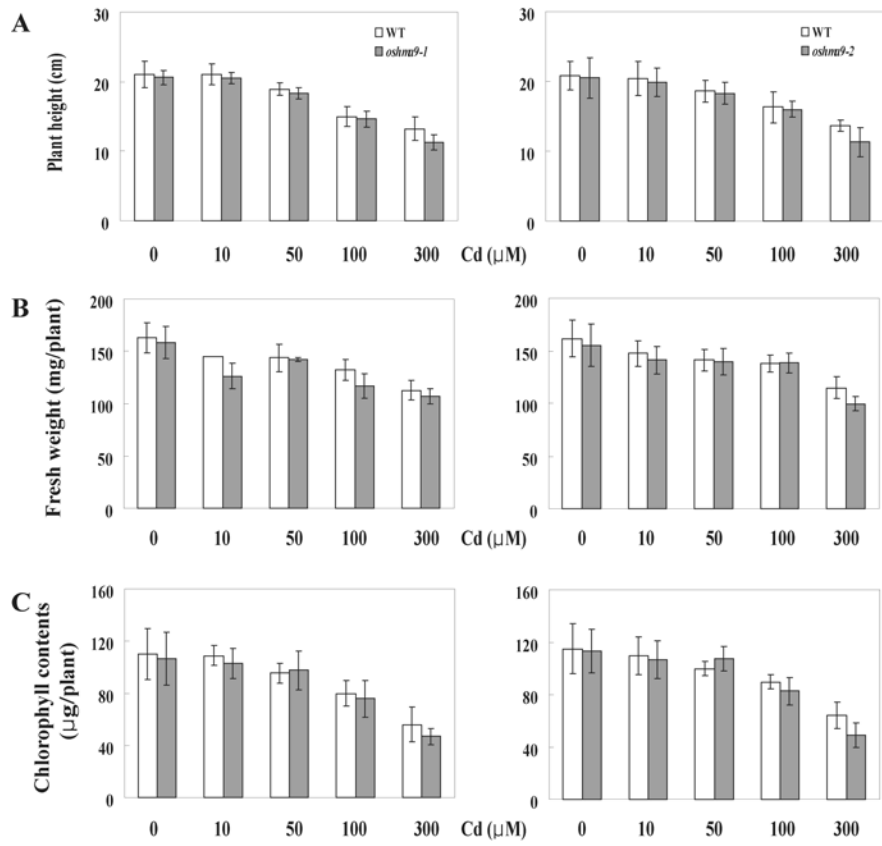

Supplement: plntphys_pp.107.102236_8.pdf [file plntphys_pp.107.102236_8.pdf]
